# Supplementary material for: Intelligent Device for Harvesting the Vibration Energy of the Automobile Exhaust with a Piezoelectric Generator
Source: Micromachines (Basel). 2023 Feb 20;14(2):491. doi: 10.3390/mi14020491 (PMC9960593; doi:10.3390/mi14020491)
Supplement: Supplementary file 1 [file micromachines-14-00491-s001.zip]

Archive with 4 entries (4 files):
- micromachines-2221829 supplementary.pdf
- Supporting Video S1-The generating unit drives the LED warning light.mp4
- Supporting Video S2-The generating unit drives the sensor.mp4
- Supporting Video S3-The car exhaust system vibrates to drive LED warning lights.mp4
